# Supplementary material for: SARS-CoV-2 infection and adverse outcomes in users of ACE inhibitors and angiotensin-receptor blockers: a nationwide case-control and cohort analysis
Source: HighWire-hosted journal article supplement (doi:10.1136/thoraxjnl-2020-215768), 2020-12-08
Supplement: thoraxjnl-2020-215768supp001_data_supplement.pdf [file thoraxjnl-2020-215768supp001_data_supplement.pdf]

## SUPPLEMENTAL CONTENT

eFigure 1. Cohort study design diagram.

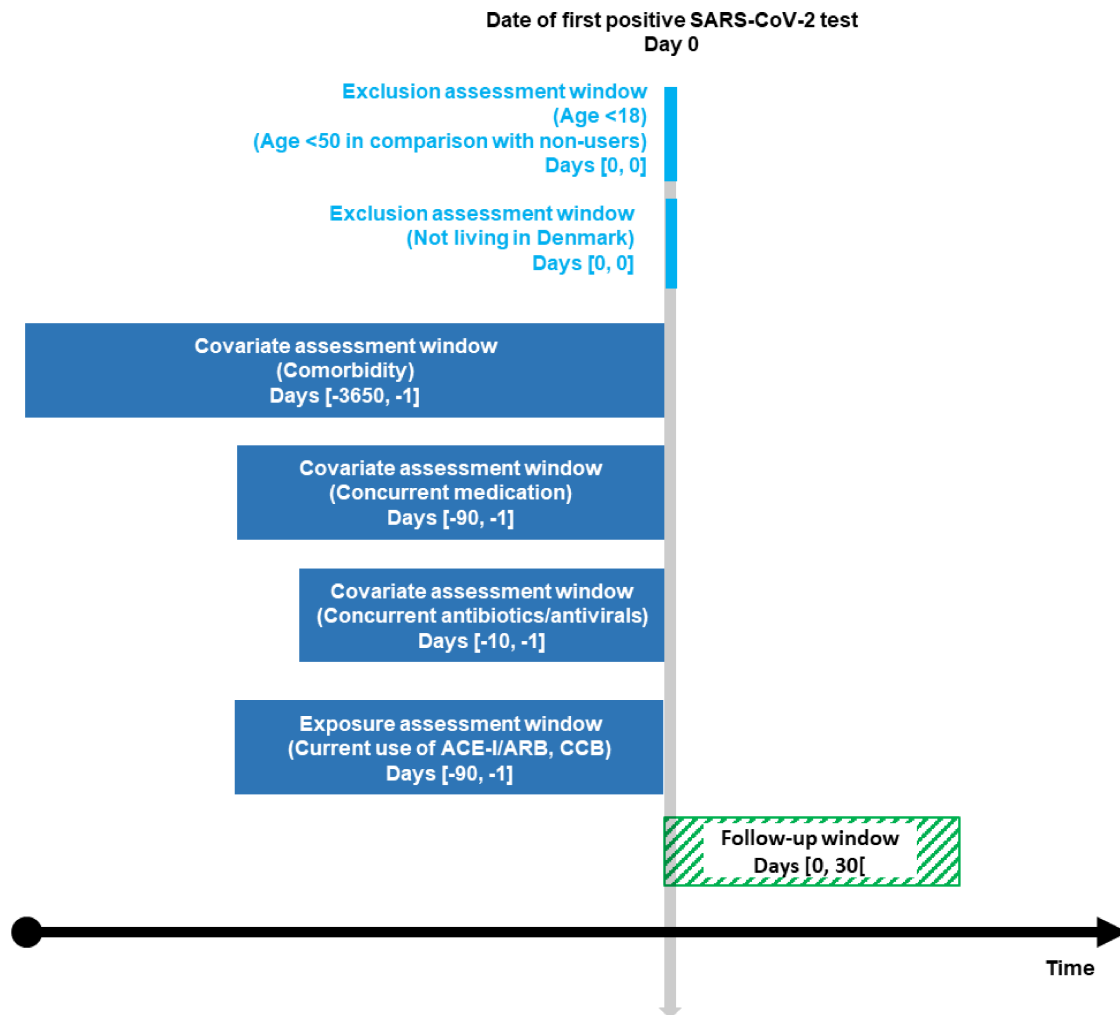

**Table 1. Medication, diagnosis and treatment codes used in the study.**

|                                                                                   | Source/<br>coding | Look-<br>back | Inclusion codes                                                                                            | Exclusion<br>codes                       |
|-----------------------------------------------------------------------------------|-------------------|---------------|------------------------------------------------------------------------------------------------------------|------------------------------------------|
| <b>Exposures (ATC codes)</b>                                                      |                   |               |                                                                                                            |                                          |
| Number of antihypertensives                                                       | NPD/ATC           | 90d           | 0-5 (see below: ACEI/ARB, CCB, Thiazides/diuretics, BB, other antihypertensives)                           |                                          |
| ACEI                                                                              | NPD/ATC           | 90d           | C09A, C09B                                                                                                 |                                          |
| ARB                                                                               | NPD/ATC           | 90d           | C09C, C09D                                                                                                 |                                          |
| Calcium channel blockers (CCB)                                                    | NPD/ATC           | 90d           | C07FB, C08CA, C09BB, C09DB, C09DX01                                                                        |                                          |
| Thiazides/diuretics                                                               | NPD/ATC           | 90d           | C03AA01, C03AA03, C03AB01, C03AB03, C03AX01, C03EA, C07B, C09BA, C09DA, C09DX01, C09DX03, C09XA52, C09XA54 | C07BA06<br>C09BA04                       |
| Beta-blockers (BB)                                                                | NPD/ATC           | 90d           | C07                                                                                                        |                                          |
| Other antihypertensives                                                           | NPD/ATC           | 90d           | C02AC, C02CA, C03BA11, C09XA C02AB01                                                                       | C09XA54                                  |
| <b>Outcomes</b>                                                                   |                   |               |                                                                                                            |                                          |
| ICU admission (procedure code)                                                    | DNPR/Procedure    |               | NABE, NABB                                                                                                 |                                          |
| Mechanical ventilation (procedure code)                                           | DNPR/Procedure    |               | BGDA0                                                                                                      |                                          |
| Acute renal replacement therapy (dialysis) (in patients without chronic dialysis) | DNPR/Procedure    |               | BJFD0                                                                                                      | BJFD2 (any codes within prior 12 months) |
| Treatment with inotropes/vasopressors                                             | DNPR/Procedure    |               | BFHC92A, BFHC92B, BFHC92C, BFHC92D, BFHC92E, BFHC93A, BFHC93B, BFHC93C, BFHC95                             |                                          |
| <b>Covariates</b>                                                                 |                   |               |                                                                                                            |                                          |
| Age                                                                               | CPR               |               |                                                                                                            |                                          |
| Sex                                                                               | CPR               |               |                                                                                                            |                                          |
| Marital status                                                                    | CPR               |               | (Widowed, divorced, married, unmarried, or unknown)                                                        |                                          |
| Rural/urban place of residence                                                    | CPR               |               | (Urban = Living in the cities of Copenhagen, Aarhus, Odense, or Aalborg)                                   |                                          |
| Ethnicity                                                                         | CPR               |               | (First-/ second-generation immigrant or non-immigrant)                                                     |                                          |
| Calendar time (before / after lockdown was instituted March 13, 2020)             | DNPR              |               |                                                                                                            |                                          |
| Hospital-diagnosed hypertension                                                   | DNPR/ICD-10       | 10y           | I10, I15                                                                                                   |                                          |
| Stable angina pectoris (without procedures)                                       | DNPR/ICD-10       | 10y           | I20, I251, I259                                                                                            | I21, I22, I23, I200                      |
| Stable angina pectoris or CABG/PCI procedures                                     | DNPR/ICD-10       | 10y           | I20, I251, I259                                                                                            | I21, I22, I23, I200                      |
|                                                                                   | DNPR/Procedure    | 10y           | KFNA, KFNB, KFNC, KFND, KFNE, KFNF, KFNG, KFNH20                                                           | I21, I22, I23, I200                      |

|                                                                                                            |                |     |                                                                                                |                                                                                      |
|------------------------------------------------------------------------------------------------------------|----------------|-----|------------------------------------------------------------------------------------------------|--------------------------------------------------------------------------------------|
|                                                                                                            |                |     |                                                                                                | (any diagnosis during hospital contact with the procedure or within 10 years before) |
| Myocardial infarction                                                                                      | DNPR/ICD-10    | 10y | I21, I22, I23                                                                                  |                                                                                      |
| Heart failure                                                                                              | DNPR/ICD-10    | 10y | I50                                                                                            |                                                                                      |
| Stroke                                                                                                     | DNPR/ICD-10    | 10y | I60, I61, I63, I64                                                                             |                                                                                      |
| Atrial fibrillation/flutter                                                                                | DNPR/ICD-10    | 10y | I48                                                                                            |                                                                                      |
| Heart valve disease                                                                                        | DNPR/ICD-10    | 10y | I05, I06, I07, I08, I09.8, I34-I37, I39, I51.1A, Q22, Q23                                      |                                                                                      |
| Venous thromboembolism                                                                                     | DNPR/ICD-10    | 10y | I26, I801, I802, I803                                                                          |                                                                                      |
| Diabetes                                                                                                   | DNPR/ICD-10    | 10y | E10, E11, E12, E13, E14, O24, G63.2, H360, N083                                                | O24.4                                                                                |
|                                                                                                            | NPD/ATC        | 10y | A10A, A10B                                                                                     |                                                                                      |
| Chronic pulmonary disease                                                                                  | DNPR/ICD-10    | 10y | J40, J41-J44, J45-J47, J60-J67, J68.4, J70.1, J70.3, J84.1, J92.0, J96.1, J98.2, J98.3         |                                                                                      |
| Markers of smoking (diagnoses or medications for tobacco smoking or chronic obstructive pulmonary disease) | DNPR/ICD-10    | 10y | J41-J44, F17, Z716, Z720                                                                       |                                                                                      |
|                                                                                                            | NPD/ATC        | 10y | R03, N07BA                                                                                     |                                                                                      |
| Obesity diagnoses or medications                                                                           | DNPR/ICD-10    | 10y | E66                                                                                            |                                                                                      |
|                                                                                                            | NPD/ATC        | 10y | A08                                                                                            |                                                                                      |
| Alcoholism-related diagnoses or medication for alcohol deterrent                                           | DNPR/ICD-10    | 10y | DF10, DE244, DG312, DG621, DG721, DI426, DK292, DK70, DK852, DK860, DQ860, DZ502, DZ714, DZ721 | F100                                                                                 |
|                                                                                                            | NPD/ATC        | 10y | V03AA, N07BB                                                                                   |                                                                                      |
| Kidney disease diagnosis                                                                                   | DNPR/ICD-10    | 10y | I12, I13, N00-N05, N07, N11, N14, N18-N19, Q61, N08, E102, E112, E142                          |                                                                                      |
| End-stage renal disease (kidney transplant or dialysis)                                                    | DNPR/Procedure | 10y | BJFD2                                                                                          |                                                                                      |
|                                                                                                            | DNPR/Surgery   | 10y | KKAS                                                                                           |                                                                                      |
|                                                                                                            | DNPR/ICD-10    | 10y | T861, Z940                                                                                     |                                                                                      |
| Liver disease                                                                                              | DNPR/ICD-10    | 10y | B18, B150, B160, B162, B190, I85, K70, K71, K72, K73, K74, K760, K76.6                         |                                                                                      |
| Dementia                                                                                                   | DNPR/ICD-10    | 10y | DF00, DF01, DF02, DF03, DG30, DG310B, DG311, DG318, DG319                                      |                                                                                      |

|                                                        |                        |            |                                                           |     |
|--------------------------------------------------------|------------------------|------------|-----------------------------------------------------------|-----|
| Cancer (including metastatic cancer)                   | NPD/ATC<br>DNPR/ICD-10 | 10y<br>10y | N06D<br>C00–C96, D459, D46, D471, D473, D474, D475, CxxxM | C44 |
| Concurrent antihypertensive medication (see exposures) | NPD/ATC                |            |                                                           |     |
| Statins                                                | NPD/ATC                | 90d        | C10AA, C10B                                               |     |
| Aspirin                                                | NPD/ATC                | 90d        | B01AC06, N02BA01, N02BA51                                 |     |
| Opioid use                                             | NPD/ATC                | 90d        | N02A, N07BC02                                             |     |
| Immunosuppressant use                                  | NPD/ATC                | 90d        | L04                                                       |     |
| Glucocorticoids                                        | NPD/ATC                | 90d        | H02AB                                                     |     |
| Loop diuretics                                         | NPD/ATC                | 90d        | C03C                                                      |     |
| Antibiotics                                            | NPD/ATC                | 10d        | J01                                                       |     |
| Antivirals                                             | NPD/ATC                | 10d        | J05                                                       |     |
| Vitamin K antagonists                                  | NPD/ATC                | 90d        | B01AA                                                     |     |
| Antidepressants                                        | NPD/ATC                | 90d        | N06A                                                      |     |
| Antipsychotics                                         | NPD/ATC                | 90d        | N05A                                                      |     |
| Hypnotics/sedatives                                    | NPD/ATC                | 90d        | N05C                                                      |     |

Abbreviations: ATC, Anatomical Therapeutic Chemical Classification System; CPR, Danish Civil Registration System; DNPR, Danish National Patient Registry; ICD-10, *International Classification of Diseases, Tenth Revision*; NPD, National Prescription Database.

**eTable 2. Outcomes (death and ICU admission) among current ACEI/ARB users compared with CCB users after propensity-score weighting. Stratified by subgroups.**

|                                                       | Exposed   |                  | Unexposed |                  | Comparison          |                  |
|-------------------------------------------------------|-----------|------------------|-----------|------------------|---------------------|------------------|
|                                                       | Events    | Risk (%)         | Events    | Risk (%)         | Risk difference (%) | Relative risk    |
| <b>Death</b>                                          |           |                  |           |                  |                     |                  |
| <b>Overall</b>                                        | 131/1,065 | 12.3 (10.3-14.4) | 40/285    | 13.9 (9.2-18.6)  | -1.5 (-6.7-3.6)     | 0.89 (0.61-1.30) |
| <b>Subgroups:</b>                                     |           |                  |           |                  |                     |                  |
| <i>Age &gt;65 years</i>                               | 122/573   | 21.2 (17.7-24.7) | 45/190    | 23.5 (15.2-31.8) | -2.3 (-11.3-6.7)    | 0.90 (0.61-1.33) |
| <i>Hypertension (no other cardiovascular disease)</i> | 55/616    | 9.0 (6.7-11.3)   | 17/179    | 9.7 (5.0-14.4)   | -0.7 (-5.9-4.5)     | 0.93 (0.54-1.60) |
| <i>After lock-down</i>                                | 124/1,022 | 12.1 (10.0-14.2) | 39/276    | 14.0 (9.0-19.0)  | -1.9 (-7.2-3.5)     | 0.87 (0.58-1.29) |
| <b>ICU admission</b>                                  |           |                  |           |                  |                     |                  |
| <b>Overall</b>                                        | 66/1,058  | 6.3 (4.8-7.8)    | 15/283    | 5.4 (2.3-8.4)    | 0.9 (-2.4-4.3)      | 1.17 (0.64-2.16) |
| <b>Subgroups:</b>                                     |           |                  |           |                  |                     |                  |
| <i>Age &gt;65 years</i>                               | 53/567    | 9.3 (6.9-11.7)   | 14/188    | 7.4 (0.9-14.0)   | 1.9 (-5.1-8.8)      | 1.25 (0.50-3.14) |
| <i>Hypertension (no other cardiovascular disease)</i> | 39/613    | 6.3 (4.3-8.4)    | 7/179     | 3.9 (0.7-7.0)    | 2.5 (-1.3-6.2)      | 1.64 (0.68-3.97) |
| <i>After lock-down</i>                                | 64/1,016  | 6.3 (4.8-7.8)    | 16/273    | 5.7 (2.0-9.4)    | 0.6 (-3.4-4.5)      | 1.10 (0.55-2.18) |

Abbreviations: ACEI, Angiotensin converting enzyme inhibitors; ARB, Angiotensin receptor blockers; CCB, Calcium channel blockers; ICU, Intensive care unit

**eTable 3. Outcomes (death and ICU admission) by different exposure definitions after inverse probability of treatment weighting.**

| <i>Death</i>                                                            | Exposed   |                  | Unexposed |                  | Comparison          |                   |
|-------------------------------------------------------------------------|-----------|------------------|-----------|------------------|---------------------|-------------------|
|                                                                         | Events    | Risk (%)         | Events    | Risk (%)         | Risk difference (%) | Relative risk     |
| <b>cACEI/ARB vs. cCCB</b>                                               | 131/1,065 | 12.3 (10.3-14.4) | 40/285    | 13.9 (9.2-18.6)  | -1.5 (-6.7-3.6)     | 0.89 (0.61-1.30)  |
| <b>cACEI/ARB vs. no ACEI/ARB (50+)</b>                                  | 112/1,179 | 9.5 (7.5-11.5)   | 512/4,738 | 10.8 (9.1-12.5)  | -1.3 (-3.9-1.3)     | 0.88 (0.68-1.14)  |
| <b>Other exposures:</b>                                                 |           |                  |           |                  |                     |                   |
| Former vs. no ACEI/ARB (50+)                                            | 41/464    | 8.8 (6.2-11.4)   | 420/4,343 | 9.7 (8.7-10.6)   | -0.9 (-3.6-1.9)     | 0.91 (0.67-1.24)  |
| cACEI/ARB vs. cCCB<br>with current use defined as 120 days              | 145/1,194 | 12.2 (10.2-14.1) | 41/319    | 12.9 (9.0-16.9)  | -0.7 (-5.1-3.6)     | 0.94 (0.67-1.33)  |
| cACEI/ARB vs. no ACEI/ARB (50+)<br>with current use defined as 120 days | 124/1,354 | 9.1 (7.4-10.8)   | 522/4,713 | 11.1 (9.4-12.8)  | -2.0 (-4.3-0.4)     | 0.82 (0.65-1.05)  |
| cACEI vs. cCCB                                                          | 66/425    | 15.6 (11.3-20.0) | 43/285    | 14.9 (9.8-20.0)  | 0.7 (-6.0-7.4)      | 1.05 (0.68-1.62)  |
| cARB vs. cCCB                                                           | 72/636    | 11.3 (8.6-14.0)  | 41/288    | 14.1 (9.5-18.8)  | -2.8 (-8.2-2.5)     | 0.80 (0.53-1.20)  |
| cACEI/ARB vs. thiazide                                                  | 120/1,001 | 12.0 (9.9-14.1)  | 19/202    | 9.5 (3.7-15.2)   | 2.5 (-3.6-8.6)      | 1.27 (0.67-2.38)  |
| cACEI/ARB vs. beta blocker                                              | 165/1,182 | 14.0 (9.4-18.5)  | 60/456    | 13.2 (10.0-16.5) | 0.7 (-4.9-6.3)      | 1.06 (0.70-1.59)  |
| <b>ICU admission</b>                                                    |           |                  |           |                  |                     |                   |
| <b>cACEI/ARB vs. cCCB</b>                                               | 66/1,058  | 6.3 (4.8-7.8)    | 15/283    | 5.4 (2.3-8.4)    | 0.9 (-2.4-4.3)      | 1.17 (0.64-2.16)  |
| <b>cACEI/ARB vs. no ACEI/ARB (50+)</b>                                  | 75/1,173  | 6.4 (4.7-8.1)    | 243/4,733 | 5.1 (2.2-8.1)    | 1.3 (-2.1-4.7)      | 1.25 (0.66-2.36)  |
| <b>Other exposures:</b>                                                 |           |                  |           |                  |                     |                   |
| Former vs. no ACEI/ARB (50+)                                            | 32/463    | 6.9 (4.4-9.5)    | 172/4,338 | 4.0 (3.4-4.6)    | 3.0 (0.3-5.6)       | 1.74 (1.17-2.59)  |
| cACEI/ARB vs. cCCB<br>with current use defined as 120 days              | 84/1,188  | 7.0 (5.6-8.5)    | 15/316    | 4.7 (2.3-7.1)    | 2.4 (-0.5-5.2)      | 1.50 (0.86-2.63)  |
| cACEI/ARB vs. no ACEI/ARB (50+)<br>with current use defined as 120 days | 103/1,349 | 7.6 (5.8-9.4)    | 239/4,708 | 5.1 (2.3-7.8)    | 2.5 (-0.7-5.8)      | 1.50 (0.83-2.69)  |
| cACEI vs. cCCB                                                          | 28/418    | 6.8 (4.2-9.4)    | 20/283    | 7.0 (2.5-11.4)   | -0.2 (-5.3-4.9)     | 0.98 (0.47-2.05)  |
| cARB vs. cCCB                                                           | 40/634    | 6.3 (4.3-8.3)    | 14/286    | 4.8 (2.3-7.2)    | 1.5 (-1.6-4.7)      | 1.32 (0.72-2.42)  |
| cACEI/ARB vs. thiazide                                                  | NA        | NA               | NA        | NA               | 5.7 (2.6-8.9)       | 4.24 (0.93-19.40) |
| cACEI/ARB vs. beta blocker                                              | 87/1,175  | 7.4 (3.8-11.1)   | 33/452    | 7.3 (4.0-10.5)   | 0.2 (-4.7-5.1)      | 1.02 (0.53-1.99)  |

Abbreviations: ACEI, Angiotensin converting enzyme inhibitors; ARB, Angiotensin receptor blockers; c, Current; CCB, Calcium channel blockers; NA, not available (masked to prevent identification of individuals when n<5)

**eTable 4. Characteristics by exposure group (current ACEI/ARB, no ACEI/ARB, current CCB) regardless of test result**

|                                          | <b>Current ACEI/ARB users</b><br>(n=110,330) | <b>No ACEI/ARB use</b><br>(n=952,875) | <b>Current CCB users</b><br>(n=56,591) |
|------------------------------------------|----------------------------------------------|---------------------------------------|----------------------------------------|
| <b>Age, median (IQR)</b>                 | 67 (58-76)                                   | 38 (24-54)                            | 68 (59-77)                             |
| <b>Sex (male)</b>                        | 55,846 (50.6)                                | 404,285 (42.4)                        | 28,864 (51.0)                          |
| <b>Marital status</b>                    |                                              |                                       |                                        |
| Widowed                                  | 16,449 (14.9)                                | 32,025 (3.4)                          | 9,313 (16.5)                           |
| Divorced                                 | 18,459 (16.7)                                | 97,169 (10.2)                         | 9,494 (16.8)                           |
| Married                                  | 62,299 (56.5)                                | 351,872 (36.9)                        | 31,511 (55.7)                          |
| Unmarried                                | 12,783 (11.6)                                | 470,651 (49.4)                        | 6,096 (10.8)                           |
| Unknown                                  | 340 (0.3)                                    | 1,158 (0.1)                           | 177 (0.3)                              |
| <b>Ethnicity</b>                         |                                              |                                       |                                        |
| Non-immigrant                            | 102,792 (93.2)                               | 807,456 (84.7)                        | 52,765 (93.2)                          |
| First- or second-generation immigrant    | 7,538 (6.8)                                  | 145,419 (15.3)                        | 3,826 (6.8)                            |
| <b>Residence</b>                         |                                              |                                       |                                        |
| Non-urban                                | 76,907 (69.7)                                | 551,966 (57.9)                        | 40,045 (70.8)                          |
| Urban                                    | 33,423 (30.3)                                | 400,909 (42.1)                        | 16,546 (29.2)                          |
| <b>Health care professional</b>          |                                              |                                       |                                        |
| Physician                                | 455 (0.4)                                    | 9,961 (1.0)                           | 217 (0.4)                              |
| Nurse                                    | 1,771 (1.6)                                  | 30,429 (3.2)                          | 729 (1.3)                              |
| Care assistant                           | 2,037 (1.8)                                  | 22,091 (2.3)                          | 947 (1.7)                              |
| <b>Use of antihypertensives</b>          |                                              |                                       |                                        |
| Angiotensin converting enzyme inhibitors | 46,782 (42.4)                                | -                                     | 12,532 (22.1)                          |
| Angiotensin receptor blockers            | 64,354 (58.3)                                | -                                     | 18,289 (32.3)                          |
| Calcium channel blockers                 | 30,604 (27.7)                                | 19,850 (2.1)                          | 56,591 (100.0)                         |
| Thiazides                                | 33,622 (30.5)                                | 11,409 (1.2)                          | 14,031 (24.8)                          |
| Beta blockers                            | 28,483 (25.8)                                | 26,275 (2.8)                          | 14,370 (25.4)                          |
| Other antihypertensives                  | 1,919 (1.7)                                  | 1,000 (0.1)                           | 1,566 (2.8)                            |
| <b>Diagnoses</b>                         |                                              |                                       |                                        |
| Hypertension                             | 48,937 (44.4)                                | 34,836 (3.7)                          | 27,620 (48.8)                          |
| Atrial fibrillation                      | 14,370 (13.0)                                | 21,345 (2.2)                          | 6,135 (10.8)                           |
| Obesity                                  | 12,019 (10.9)                                | 56,152 (5.9)                          | 5,500 (9.7)                            |
| Angina                                   | 16,843 (15.3)                                | 21,063 (2.2)                          | 8,505 (15.0)                           |
| Heart valve disease                      | 6,605 (6.0)                                  | 10,172 (1.1)                          | 3,362 (5.9)                            |

|                                       |                      |                       |                      |
|---------------------------------------|----------------------|-----------------------|----------------------|
| Alcohol abuse                         | 4,804 (4.4)          | 21,345 (2.2)          | 2,546 (4.5)          |
| Diabetes                              | 27,006 (24.5)        | 34,298 (3.6)          | 12,452 (22.0)        |
| Venous thromboembolism                | 3,837 (3.5)          | 11,906 (1.2)          | 1,917 (3.4)          |
| Dementia                              | 2,576 (2.3)          | 6,887 (0.7)           | 1,485 (2.6)          |
| Myocardial infarction                 | 6,082 (5.5)          | 6,637 (0.7)           | 2,600 (4.6)          |
| Liver disease                         | 1,689 (1.5)          | 8,155 (0.9)           | 879 (1.6)            |
| Kidney disease                        | 5,888 (5.3)          | 7,720 (0.8)           | 4,073 (7.2)          |
| Chronic obstructive pulmonary disease | 13,410 (12.2)        | 56,044 (5.9)          | 6,894 (12.2)         |
| End-stage renal disease               | 352 (0.3)            | 714 (0.1)             | 437 (0.8)            |
| Heart failure                         | 9,786 (8.9)          | 5,122 (0.5)           | 2,012 (3.6)          |
| Cancer                                | 14,748 (13.4)        | 41,817 (4.4)          | 8,032 (14.2)         |
| Stroke                                | 8,264 (7.5)          | 12,739 (1.3)          | 5,004 (8.8)          |
| <b>Markers of smoking</b>             | <b>39,884 (36.1)</b> | <b>245,705 (25.8)</b> | <b>20,330 (35.9)</b> |
| <b>Medication</b>                     |                      |                       |                      |
| Statins                               | 43,769 (39.7)        | 42,956 (4.5)          | 22,058 (39.0)        |
| Antiviral                             | 1,117 (1.0)          | 10,877 (1.1)          | 553 (1.0)            |
| Low-dose acetylsalicylic acid         | 16,737 (15.2)        | 16,868 (1.8)          | 9,111 (16.1)         |
| Vitamin K-antagonists                 | 3,259 (3.0)          | 4,048 (0.4)           | 1,375 (2.4)          |
| Opioids                               | 12,914 (11.7)        | 34,683 (3.6)          | 7,119 (12.6)         |
| Antidepressants                       | 15,166 (13.7)        | 55,507 (5.8)          | 8,243 (14.6)         |
| Immunosuppressants                    | 822 (0.7)            | 3,183 (0.3)           | 405 (0.7)            |
| Antipsychotics                        | 3,270 (3.0)          | 18,408 (1.9)          | 1,791 (3.2)          |
| Glucocorticoids                       | 4,669 (4.2)          | 13,543 (1.4)          | 2,534 (4.5)          |
| Hypnotics                             | 6,395 (5.8)          | 21,623 (2.3)          | 3,554 (6.3)          |
| Loop diuretics                        | 12,532 (11.4)        | 13,744 (1.4)          | 6,003 (10.6)         |
| Antibiotics                           | 18,183 (16.5)        | 89,109 (9.4)          | 9,589 (16.9)         |

Abbreviations: ACEI, angiotensin converting enzyme inhibitors; ARB, angiotensin receptor blocker; CCB, calcium channel blocker.



**eTable 5. Positive:negative ratio of SARS-CoV-2 test in exposure groups overall and stratified by age groups.**

|                          | <b>Current ACEI/ARB users</b> | <b>No ACEI/ARB use</b> | <b>Current CCB users</b> |
|--------------------------|-------------------------------|------------------------|--------------------------|
| <b>Overall</b>           | 0.0135                        | 0.0122                 | 0.0123                   |
| <b>Age group (years)</b> |                               |                        |                          |
| 18-29                    | 0.0078                        | 0.0112                 | 0.0164                   |
| 30-44                    | 0.0124                        | 0.0129                 | 0.0108                   |
| 45-65                    | 0.0137                        | 0.0147                 | 0.0116                   |
| >65                      | 0.0134                        | 0.0140                 | 0.0129                   |

Abbreviations: ACEI, angiotensin converting enzyme inhibitors; ARB, angiotensin receptor blocker; CCB, calcium channel blocker.
